# Supplementary material for: Absolute Quantitation of Met Using Mass Spectrometry for Clinical Application: Assay Precision, Stability, and Correlation with MET Gene Amplification in FFPE Tumor Tissue
Source: PLOS journal article supplement (doi:10.1371/journal.pone.0100586), 2014-07-01

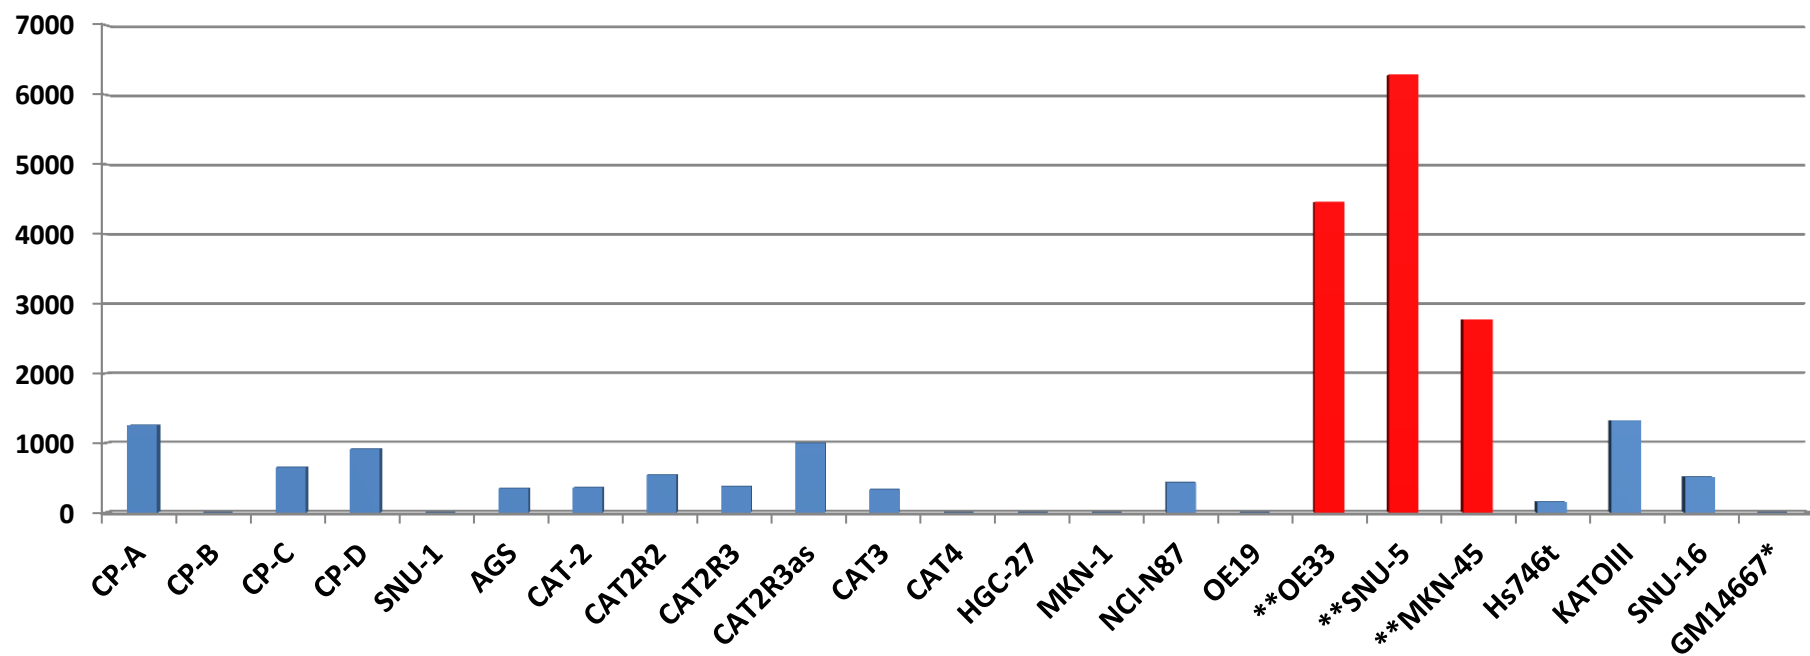

Supplement: S1 (10.1371/journal.pone.0100586.s001) [file journal.pone.0100586.s001.pdf › journal.pone.0100586.s001.pdf]
