# Supplementary material for: Absolute Quantitation of Met Using Mass Spectrometry for Clinical Application: Assay Precision, Stability, and Correlation with MET Gene Amplification in FFPE Tumor Tissue
Source: PLOS journal article supplement (doi:10.1371/journal.pone.0100586), 2014-07-01

**IHC**

**FISH**

**Primary  
Tumor**

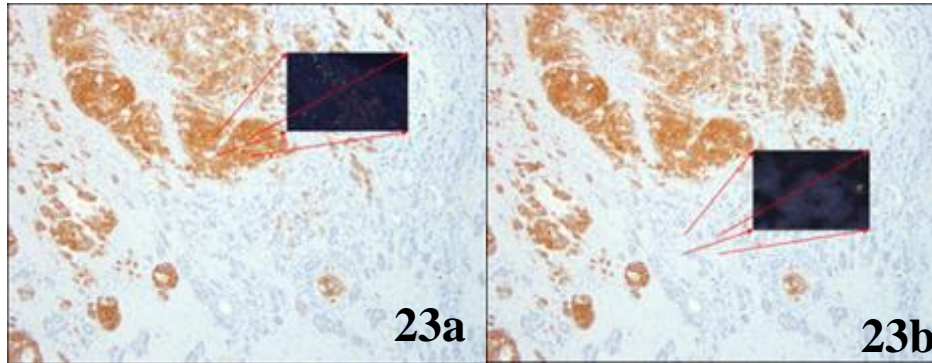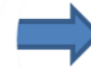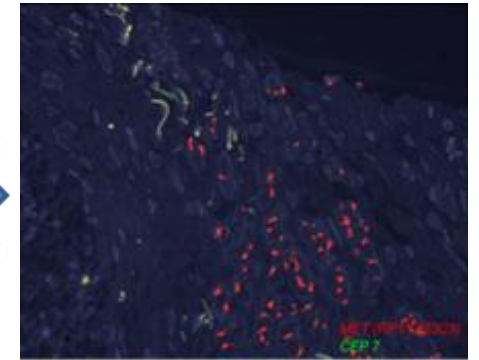

**Metastatic  
Lymph  
Node**

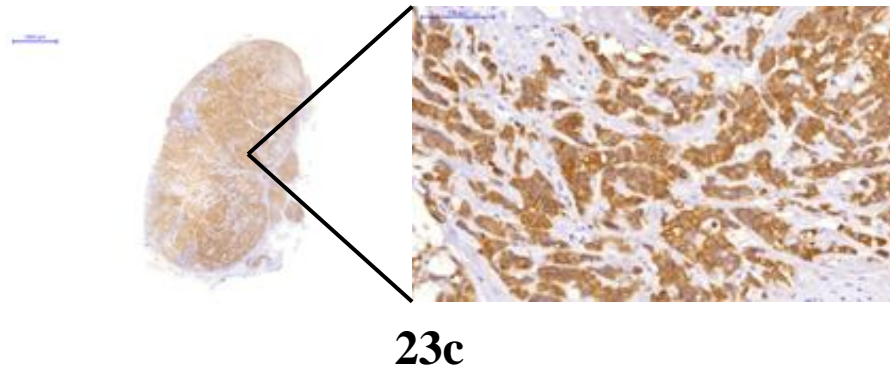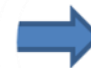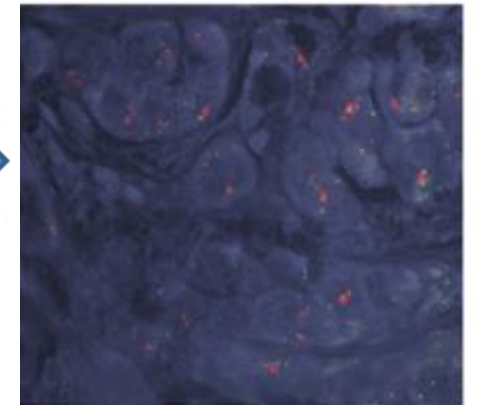

Supplement: S2 (10.1371/journal.pone.0100586.s002) [file journal.pone.0100586.s002.pdf › journal.pone.0100586.s002.pdf]
