# Supplementary material for: Absolute Quantitation of Met Using Mass Spectrometry for Clinical Application: Assay Precision, Stability, and Correlation with MET Gene Amplification in FFPE Tumor Tissue
Source: PLOS journal article supplement (doi:10.1371/journal.pone.0100586), 2014-07-01
Supplement: S3 (10.1371/journal.pone.0100586.s003) [file journal.pone.0100586.s003.pdf › journal.pone.0100586.s003.pdf]

# Immortalized Preneoplastic Lesions GEJ

# KRAS Mutant

# PIK3A Mutant

# GM14667 Lymphoblast Control

CP-A

CP-B

CP-C

CP-D

SNU-1

AGS Scr

AGS RON KD

HGC-27

RON  
N-Term

RON  
C-Term

p-RON

Met

KRAS  
Amplified

HER2  
Amplified

MET  
Amplified

MET  
982-1028  
del147

FGFR2  
Amplified

CAT-2

NCI-N87

OE-19

OE-33

SNU-5

MKN-45

Hs746t

KATO-III

SNU-16

RON  
N-Term

RON  
C-Term

p-RON

Met
